# Supplementary material
Source: PubMed Central journal article supplement (PMC2902600)
Supplement: NIHMS215267-supplement-01.pdf [file NIHMS215267-supplement-01.pdf]

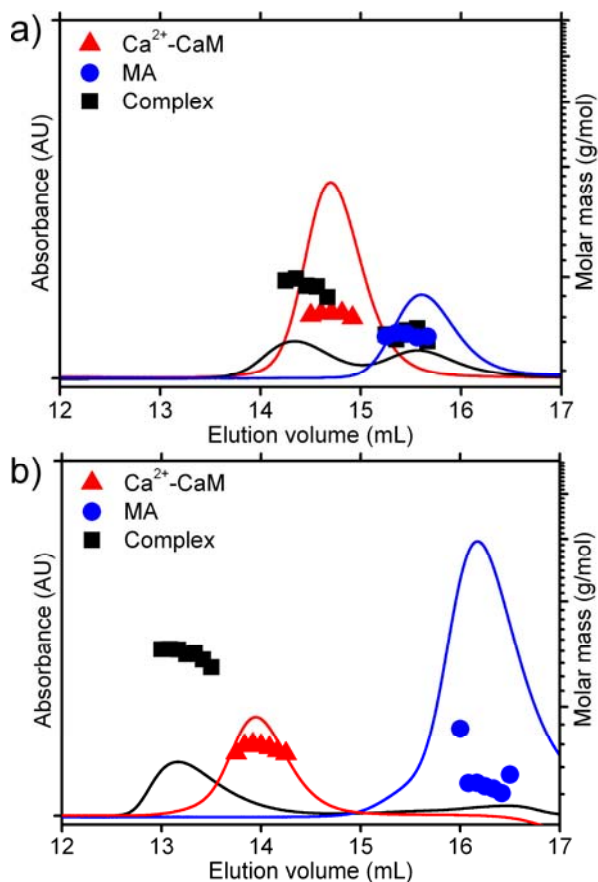

**Supplemental Figure: Formation of  $\text{Ca}^{2+}$ -CaM-MA and experimental mass in the presence and absence of NaCl. a)** UV trace (lines) and MALLS experimental molar masses for  $\text{Ca}^{2+}$ -CaM (red  $\blacktriangle$ ), MA (blue  $\bullet$ ), and their complex (black  $\blacksquare$ ) in 100 mM NaCl. The determined masses for  $\text{Ca}^{2+}$ -CaM (16400) and MA (13900) are close to their calculated values based on primary amino acid sequence (16706 and 14979 respectively). The protein complex separates into two peaks with experimental masses of 20400 and 15000, similar to those for free CaM and MA and indicating the absence of a strong interaction between the two components. **b)** UV trace (lines) and MALLS experimental molar masses for  $\text{Ca}^{2+}$ -CaM (red  $\blacktriangle$ ), MA (blue  $\bullet$ ), and their complex (black  $\blacksquare$ ) in the absence of NaCl. The masses for the individual proteins  $\text{Ca}^{2+}$ -CaM (16700) and MA (12700) are similar to the predicted values, while the complex elutes as a single peak ( $M_r$  29900) indicating the formation of a complex with 1:1 stoichiometry.
